# Supplementary material
Source: PubMed Central journal article supplement (PMC3774163)
Supplement: NIHMS452742-supplement-supplement_1.pdf [file NIHMS452742-supplement-supplement_1.pdf]

**Table S1.** Articles meeting inclusion criteria for all disorders.

| <b>Disease Category</b>                                     | <b>Study</b>                                | <b>Cases (N)</b>    | <b>Controls (N)</b> |
|-------------------------------------------------------------|---------------------------------------------|---------------------|---------------------|
| ID                                                          | Bachmann-Gagescu et al. (2010) <sup>1</sup> | 23,084 <sup>a</sup> | 7,700               |
|                                                             | Cooper et al. (2011) <sup>2</sup>           | 15,767              | 8,329               |
|                                                             | Girirajan et al. (2010) <sup>3</sup>        | 11,873              | 8,540               |
|                                                             |                                             | 9,254 <sup>b</sup>  | 6,299 <sup>b</sup>  |
|                                                             | Hannes et al. (2009) <sup>4</sup>           | 1,027               | 2,014               |
|                                                             | Kaminsky et al. (2011) <sup>5</sup>         | 15,749              | 10,118              |
|                                                             | Mefford et al. (2008) <sup>6</sup>          | 5,218               | 2,063               |
|                                                             | Mefford et al. (2009) <sup>7</sup>          | 1,010               | 2,493               |
|                                                             | Rosenfeld et al. (2010) <sup>8</sup>        | 9,773               | 2,493               |
| Sharp et al. (2008) <sup>9</sup>                            | 1,040                                       | 960                 |                     |
| ASD                                                         | Glessner et al. (2009) <sup>10</sup>        | 859                 | 1,409               |
|                                                             |                                             | 1,336 <sup>b</sup>  | 1,110 <sup>b</sup>  |
|                                                             | Kumar et al. (2008) <sup>11</sup>           | 180                 | 372                 |
|                                                             |                                             | 532 <sup>c</sup>    | 465 <sup>c</sup>    |
|                                                             | Marshall et al. (2008) <sup>12</sup>        | 427                 | 500                 |
|                                                             |                                             |                     | 1,152 <sup>b</sup>  |
|                                                             | Moreno-De-Luca et al. (2010) <sup>13</sup>  | 15,749              | 4,519               |
|                                                             |                                             | 1,182 <sup>d</sup>  | 47,929 <sup>b</sup> |
|                                                             | Pinto et al. (2010) <sup>14</sup>           | 996                 | 1,287               |
|                                                             |                                             |                     | 3,677 <sup>b</sup>  |
| Schizophrenia                                               | Sanders et al. (2011) <sup>15</sup>         | 1,124 <sup>e</sup>  | 872 <sup>e</sup>    |
|                                                             | Sato et al. (2012) <sup>16</sup>            | 1,614               | 15,122              |
|                                                             | Weiss et al. (2008) <sup>17</sup>           | 512                 | 434                 |
|                                                             |                                             | 1,441               | 2,814               |
|                                                             |                                             | 299                 | 18,834              |
|                                                             | Glessner et al. (2010) <sup>18</sup>        | 977                 | 2,000               |
|                                                             |                                             | 758 <sup>b</sup>    | 1,485 <sup>b</sup>  |
| Grozeva et al. (2012) <sup>19,f</sup>                       | >5,000                                      | >37,000             |                     |
| Ingason et al. (2011a) <sup>20</sup>                        | 7,582                                       | 41,370              |                     |
| Ingason et al. (2011b) <sup>21</sup>                        | 4,345                                       | 35,079              |                     |
| International Schizophrenia Consortium (2008) <sup>22</sup> | 3,391                                       | 3,181               |                     |
| Kirov et al. (2009) <sup>23</sup>                           | 471                                         | 2,792               |                     |
| Lee et al. (2012) <sup>24</sup>                             | 5,325                                       | 9,279               |                     |
| Levinson et al. (2011) <sup>25</sup>                        | 3,945                                       | 3,611               |                     |
| McCarthy et al. (2009) <sup>26</sup>                        | 1,906                                       | 3,971               |                     |
|                                                             | 2,645 <sup>b</sup>                          | 2,420 <sup>b</sup>  |                     |
| Moreno-De-Luca et al. (2010) <sup>13</sup>                  | 6,340                                       | 47,929              |                     |
| Mulle et al. (2010) <sup>27</sup>                           | 7,545                                       | 39,748              |                     |
| Rujescu et al. (2009) <sup>28</sup>                         | 2,977                                       | 33,746              |                     |

|          |                                        |                    |                    |
|----------|----------------------------------------|--------------------|--------------------|
| Epilepsy | Stefansson et al. (2008) <sup>29</sup> | 1,433              | 33,250             |
|          |                                        | 3,285 <sup>b</sup> | 7,951 <sup>b</sup> |
|          | Vacic et al. (2011) <sup>30</sup>      | 8,290              | 7,431              |
|          | Zhao et al. (2012) <sup>31</sup>       | 2,058              | 3,275              |
|          | de Kovel et al. (2010) <sup>32</sup>   | 1,234              | 3,022              |
|          | Dibbens et al. (2009) <sup>33</sup>    | 539                | 3,777              |
|          | Heinzen et al. (2010) <sup>34</sup>    | 3,812              | 1,299              |
|          | Helbig et al. (2009) <sup>35</sup>     | 1,223              | 3,699              |
|          | Mefford et al. (2010) <sup>36</sup>    | 517                | 2,493              |

Note: Eight autism spectrum disorder (ASD), 9 intellectual disability (ID), 15 schizophrenia, and 5 epilepsy articles were eligible. The number of cases and controls are reported.

<sup>a</sup>Patients referred for genetic testing due to developmental delay

<sup>b</sup>Replicated cohort sample

<sup>c</sup>Follow-up cohort

<sup>d</sup>Replicated cohort, ASD/neurocognitive impairment cohort

<sup>e</sup>872 matched probands, 872 matched sibling; 4,457 total participants

<sup>f</sup>10,259 control subjects from UK Wellcome Trust Case Control Consortium as well as controls from other published studies and compared with previously published schizophrenia articles

1. Bachmann-Gagescu R, Mefford HC, Cowan C, et al. Recurrent 200-kb deletions of 16p11.2 that include the SH2B1 gene are associated with developmental delay and obesity. *Genetics in medicine : official journal of the American College of Medical Genetics*. 2010;12(10):641-647.
2. Cooper GM, Coe BP, Girirajan S, et al. A copy number variation morbidity map of developmental delay. *Nature genetics*. Sep 2011;43(9):838-846.
3. Girirajan S, Rosenfeld JA, Cooper GM, et al. A recurrent 16p12.1 microdeletion supports a two-hit model for severe developmental delay. *Nature genetics*. Mar 2010;42(3):203-209.
4. Hannes FD, Sharp AJ, Mefford HC, et al. Recurrent reciprocal deletions and duplications of 16p13.11: the deletion is a risk factor for MR/MCA while the duplication may be a rare benign variant. *Journal of medical genetics*. Apr 2009;46(4):223-232.
5. Kaminsky EB, Kaul V, Paschall J, et al. An evidence-based approach to establish the functional and clinical significance of copy number variants in intellectual and developmental disabilities. *Genetics in medicine : official journal of the American College of Medical Genetics*. Sep 2011;13(9):777-784.
6. Mefford HC, Sharp AJ, Baker C, et al. Recurrent rearrangements of chromosome 1q21.1 and variable pediatric phenotypes. *The New England journal of medicine*. Oct 16 2008;359(16):1685-1699.
7. Mefford HC, Cooper GM, Zerr T, et al. A method for rapid, targeted CNV genotyping identifies rare variants associated with neurocognitive disease. *Genome Res*. Sep 2009;19(9):1579-1585.
8. Rosenfeld JA, Coppinger J, Bejjani BA, et al. Speech delays and behavioral problems are the predominant features in individuals with developmental delays and 16p11.2 microdeletions and microduplications. *J Neurodev Disord*. Mar 2010;2(1):26-38.
9. Sharp AJ, Mefford HC, Li K, et al. A recurrent 15q13.3 microdeletion syndrome associated with mental retardation and seizures. *Nature genetics*. Mar 2008;40(3):322-328.
10. Glessner JT, Wang K, Cai G, et al. Autism genome-wide copy number variation reveals ubiquitin and neuronal genes. *Nature*. May 28 2009;459(7246):569-573.
11. Kumar RA, KaraMohamed S, Sudi J, et al. Recurrent 16p11.2 microdeletions in autism. *Hum*

- Mol Genet. Feb 15 2008;17(4):628-638.
12. Marshall CR, Noor A, Vincent JB, et al. Structural variation of chromosomes in autism spectrum disorder. *Am J Hum Genet.* Feb 2008;82(2):477-488.
  13. Moreno-De-Luca D, Mulle JG, Kaminsky EB, et al. Deletion 17q12 is a recurrent copy number variant that confers high risk of autism and schizophrenia. *Am J Hum Genet.* Nov 12 2010;87(5):618-630.
  14. Pinto D, Pagnamenta AT, Klei L, et al. Functional impact of global rare copy number variation in autism spectrum disorders. *Nature.* Jul 15 2010;466(7304):368-372.
  15. Sanders SJ, Hus V, Luo R, et al. Multiple recurrent de novo CNVs, including duplications of the 7q11.23 Williams syndrome region, are strongly associated with autism. *Neuron.* 2011;70(5):863-885.
  16. Sato D, Lionel AC, Leblond CS, et al. SHANK1 Deletions in Males with Autism Spectrum Disorder. *Am J Hum Genet.* May 4 2012;90(5):879-887.
  17. Weiss LA, Shen Y, Korn JM, et al. Association between microdeletion and microduplication at 16p11.2 and autism. *The New England journal of medicine.* Feb 14 2008;358(7):667-675.
  18. Glessner JT, Reilly MP, Kim CE, et al. Strong synaptic transmission impact by copy number variations in schizophrenia. *Proceedings of the National Academy of Sciences.* Jun 8 2010;107(23):10584-10589.
  19. Grozeva D, Conrad DF, Barnes CP, et al. Independent estimation of the frequency of rare CNVs in the UK population confirms their role in schizophrenia. *Schizophrenia research.* Mar 2012;135(1-3):1-7.
  20. Ingason A, Kirov G, Giegling I, et al. Maternally derived microduplications at 15q11-q13: implication of imprinted genes in psychotic illness. *American Journal of Psychiatry.* 2011;168(4):408-417.
  21. Ingason A, Rujescu D, Cichon S, et al. Copy number variations of chromosome 16p13.1 region associated with schizophrenia. *Mol Psychiatry.* 2011;16(1):17-25.
  22. Rare chromosomal deletions and duplications increase risk of schizophrenia. *Nature.* 2008;455(7210):237-241.
  23. Kirov G, Grozeva D, Norton N, et al. Support for the involvement of large copy number variants in the pathogenesis of schizophrenia. *Hum Mol Genet.* Apr 15 2009;18(8):1497-1503.
  24. Lee Y, Mattai A, Long R, Rapoport JL, Gogtay N, Addington AM. Microduplications disrupting the MYT1L gene (2p25.3) are associated with schizophrenia. *Psychiatric genetics.* Aug 2012;22(4):206-209.
  25. Levinson DF, Duan J, Oh S, et al. Copy number variants in schizophrenia: confirmation of five previous findings and new evidence for 3q29 microdeletions and VIPR2 duplications. *American Journal of Psychiatry.* 2011;168(3):302-316.
  26. McCarthy SE, Makarov V, Kirov G, et al. Microduplications of 16p11.2 are associated with schizophrenia. *Nature genetics.* 2009;41(11):1223-1227.
  27. Mulle JG, Dodd AF, McGrath JA, et al. Microdeletions of 3q29 confer high risk for schizophrenia. *Am J Hum Genet.* Aug 13 2010;87(2):229-236.
  28. Rujescu D, Ingason A, Cichon S, et al. Disruption of the neurexin 1 gene is associated with schizophrenia. *Hum Mol Genet.* Mar 1 2009;18(5):988-996.
  29. Stefansson H, Rujescu D, Cichon S, et al. Large recurrent microdeletions associated with schizophrenia. *Nature.* Sep 11 2008;455(7210):232-236.
  30. Vacic V, McCarthy S, Malhotra D, et al. Duplications of the neuropeptide receptor gene VIPR2 confer significant risk for schizophrenia. *Nature.* Mar 24 2011;471(7339):499-503.
  31. Zhao Q, Li T, Zhao X, et al. Rare CNVs and Tag SNPs at 15q11.2 Are Associated With Schizophrenia in the Han Chinese Population [published online February 8]. *Schizophrenia bulletin.* 2012.
  32. de Kovel CG, Trucks H, Helbig I, et al. Recurrent microdeletions at 15q11.2 and 16p13.11 predispose to idiopathic generalized epilepsies. *Brain.* Jan 2010;133(Pt 1):23-32.
  33. Dibbens LM, Mullen S, Helbig I, et al. Familial and sporadic 15q13.3 microdeletions in idiopathic generalized epilepsy: precedent for disorders with complex inheritance. *Human Molecular Genetics.* Oct 1 2009;18(19):3626-3631.
  34. Heinzen EL, Radtke RA, Urban TJ, et al. Rare deletions at 16p13.11 predispose to a diverse

- spectrum of sporadic epilepsy syndromes. *American Journal of Human Genetics*. May 14 2010;86(5):707-718.
35. Helbig I, Mefford HC, Sharp AJ, et al. 15q13.3 microdeletions increase risk of idiopathic generalized epilepsy. *Nature genetics*. Feb 2009;41(2):160-162.
  36. Mefford HC, Muhle H, Ostertag P, et al. Genome-wide copy number variation in epilepsy: novel susceptibility loci in idiopathic generalized and focal epilepsies. *PLoS Genetics*. May 2010;6(5):e1000962.

Accepted manuscript

**Table S2.** Distribution of copy number variants (CNVs) and genes among autism spectrum disorder (ASD), intellectual disability (ID), schizophrenia, and epilepsy.

| CNV (strict)          |                      | n (%)         |               |            |
|-----------------------|----------------------|---------------|---------------|------------|
| Genes (strict)        | ID (n=27)            | ASD           | 6 (22.2)      |            |
|                       |                      | Schizophrenia | 9 (33.0)      |            |
|                       |                      | Epilepsy      | 3 (11.0)      |            |
|                       | ASD (n=13)           | ID            | 6 (46.2)      |            |
|                       |                      | Schizophrenia | 6 (46.2)      |            |
|                       |                      | Epilepsy      | 0 (0)         |            |
|                       | Schizophrenia (n=21) | ID            | 9 (43.0)      |            |
|                       |                      | ASD           | 6 (28.6)      |            |
|                       |                      | Epilepsy      | 2 (9.5)       |            |
|                       | Epilepsy (n=3)       | ID            | 3 (100)       |            |
|                       |                      | ASD           | 0 (0)         |            |
|                       |                      | Schizophrenia | 3 (100.0)     |            |
|                       | CNV (strict)         | ID (n=1,139)  | ASD           | 244 (21.4) |
|                       |                      |               | Schizophrenia | 386 (33.9) |
|                       |                      |               | Epilepsy      | 111 (9.7)  |
| ASD (n=252)           |                      | ID            | 244 (96.8)    |            |
|                       |                      | Schizophrenia | 212 (84.1)    |            |
|                       |                      | Epilepsy      | 0 (0)         |            |
| Schizophrenia (n=416) |                      | ID            | 386 (92.8)    |            |
|                       |                      | ASD           | 212 (51.0)    |            |
|                       |                      | Epilepsy      | 111 (26.7)    |            |
| Epilepsy (n=111)      |                      | ID            | 111 (100)     |            |
|                       |                      | ASD           | 0 (0)         |            |
|                       |                      | Schizophrenia | 111 (100)     |            |

Note: The number of CNVs/genes, and percentages for each disorder found within the other disorders are reported (i.e. the number of ASD CNVs/genes that are also found in ID CNVs/genes).

**Table S3.** List of significant *DSM* processes for each disorder (i.e. disorder-specific) from pathway analysis (i.e. significant processes from all genes identified from eligible autism spectrum disorder [ASD], intellectual disability [ID], schizophrenia, or epilepsy copy number variants [CNVs]).

| <b>ASD</b>                                                        | <b># Genes</b> | <b>p value</b> |
|-------------------------------------------------------------------|----------------|----------------|
| GO:0044456~synapse part                                           | 11             | 0.000          |
| GO:0045202~synapse                                                | 12             | 0.000          |
| GO:0030054~cell junction                                          | 14             | 0.000          |
| GO:0001505~regulation of neurotransmitter levels                  | 6              | 0.000          |
| GO:0016079~synaptic vesicle exocytosis                            | 4              | 0.000          |
| GO:0007268~synaptic transmission                                  | 10             | 0.000          |
| GO:0019226~transmission of nerve impulse                          | 10             | 0.001          |
| GO:0006887~exocytosis                                             | 6              | 0.002          |
| GO:0048489~synaptic vesicle transport                             | 4              | 0.002          |
| GO:0007269~neurotransmitter secretion                             | 4              | 0.002          |
| GO:0005230~extracellular ligand-gated ion channel activity        | 5              | 0.002          |
| GO:0045211~postsynaptic membrane                                  | 6              | 0.003          |
| GO:0022604~regulation of cell morphogenesis                       | 6              | 0.003          |
| GO:0042802~identical protein binding                              | 13             | 0.003          |
| GO:0006836~neurotransmitter transport                             | 5              | 0.004          |
| GO:0003001~generation of a signal involved in cell-cell signaling | 5              | 0.004          |
| GO:0032940~secretion by cell                                      | 7              | 0.005          |
| <b>ID</b>                                                         |                |                |
| GO:0043120~tumor necrosis factor binding                          | 5              | 0.000          |
| GO:0030036~actin cytoskeleton organization                        | 18             | 0.000          |
| GO:0030029~actin filament-based process                           | 18             | 0.000          |
| GO:0042493~response to drug                                       | 16             | 0.001          |
| GO:0019717~synaptosome                                            | 10             | 0.001          |
| GO:0005031~tumor necrosis factor receptor activity                | 4              | 0.001          |
| GO:0045211~postsynaptic membrane                                  | 12             | 0.003          |
| GO:0030054~cell junction                                          | 28             | 0.006          |
| GO:0007010~cytoskeleton organization                              | 23             | 0.006          |
| GO:0045202~synapse                                                | 21             | 0.007          |
| GO:0044456~synapse part                                           | 16             | 0.010          |
| GO:0007265~Ras protein signal transduction                        | 9              | 0.010          |
| GO:0008092~cytoskeletal protein binding                           | 25             | 0.013          |
| GO:0017076~purine nucleotide binding                              | 73             | 0.013          |
| GO:0007492~endoderm development                                   | 4              | 0.013          |
| GO:0007015~actin filament organization                            | 7              | 0.016          |
| GO:0004890~GABA-A receptor activity                               | 4              | 0.017          |
| GO:0005230~extracellular ligand-gated ion channel activity        | 7              | 0.018          |
| GO:0006650~glycerophospholipid metabolic process                  | 9              | 0.018          |
| GO:0002673~regulation of acute inflammatory response              | 4              | 0.020          |
| GO:0032555~purine ribonucleotide binding                          | 69             | 0.020          |

|                                                                         |    |       |
|-------------------------------------------------------------------------|----|-------|
| GO:0032553~ribonucleotide binding                                       | 69 | 0.020 |
| GO:0005501~retinoid binding                                             | 4  | 0.022 |
| GO:0016338~calcium-independent cell-cell adhesion                       | 4  | 0.023 |
| GO:0050853~B cell receptor signaling pathway                            | 3  | 0.025 |
| GO:0034707~chloride channel complex                                     | 6  | 0.027 |
| GO:0019840~isoprenoid binding                                           | 4  | 0.028 |
| GO:0016247~channel regulator activity                                   | 6  | 0.028 |
| GO:0016917~GABA receptor activity                                       | 4  | 0.032 |
| GO:0022604~regulation of cell morphogenesis                             | 9  | 0.032 |
| GO:0022834~ligand-gated channel activity                                | 9  | 0.032 |
| GO:0015276~ligand-gated ion channel activity                            | 9  | 0.032 |
| GO:0042802~identical protein binding                                    | 28 | 0.034 |
| GO:0050909~sensory perception of taste                                  | 5  | 0.035 |
| GO:0000166~nucleotide binding                                           | 80 | 0.037 |
| GO:0016879~ligase activity, forming carbon-nitrogen bonds               | 13 | 0.038 |
| GO:0008624~induction of apoptosis by extracellular signals              | 8  | 0.039 |
| GO:0001505~regulation of neurotransmitter levels                        | 6  | 0.040 |
| GO:0046474~glycerophospholipid biosynthetic process                     | 6  | 0.042 |
| GO:0051219~phosphoprotein binding                                       | 4  | 0.043 |
| GO:0002260~lymphocyte homeostasis                                       | 4  | 0.043 |
| GO:0007268~synaptic transmission                                        | 15 | 0.043 |
| GO:0006887~exocytosis                                                   | 8  | 0.044 |
| GO:0051960~regulation of nervous system development                     | 11 | 0.045 |
| GO:0045309~protein phosphorylated amino acid binding                    | 3  | 0.046 |
| GO:0048365~Rac GTPase binding                                           | 3  | 0.046 |
| GO:0015459~potassium channel regulator activity                         | 4  | 0.047 |
| GO:0007369~gastrulation                                                 | 6  | 0.047 |
| GO:0031988~membrane-bounded vesicle                                     | 26 | 0.048 |
| GO:0030554~adenyl nucleotide binding                                    | 58 | 0.049 |
| <b>Schizophrenia</b>                                                    |    |       |
| GO:0032446~protein modification by small protein conjugation            | 9  | 0.000 |
| GO:0016567~protein ubiquitination                                       | 8  | 0.000 |
| GO:0070647~protein modification by small protein conjugation or removal | 9  | 0.000 |
| GO:0019787~small conjugating protein ligase activity                    | 9  | 0.000 |
| GO:0007268~synaptic transmission                                        | 12 | 0.000 |
| GO:0016879~ligase activity, forming carbon-nitrogen bonds               | 10 | 0.001 |
| GO:0007267~cell-cell signaling                                          | 17 | 0.001 |
| GO:0004842~ubiquitin-protein ligase activity                            | 8  | 0.001 |
| GO:0016881~acid-amino acid ligase activity                              | 9  | 0.001 |
| GO:0019226~transmission of nerve impulse                                | 12 | 0.001 |
| GO:0006650~glycerophospholipid metabolic process                        | 7  | 0.002 |
| GO:0042493~response to drug                                             | 9  | 0.002 |
| GO:0045202~synapse                                                      | 12 | 0.003 |
| GO:0008360~regulation of cell shape                                     | 5  | 0.003 |
| GO:0016247~channel regulator activity                                   | 5  | 0.003 |
| GO:0006644~phospholipid metabolic process                               | 8  | 0.005 |
| GO:0008654~phospholipid biosynthetic process                            | 6  | 0.005 |

|                                                                       |    |       |
|-----------------------------------------------------------------------|----|-------|
| GO:0019637~organophosphate metabolic process                          | 8  | 0.006 |
| GO:0046474~glycerophospholipid biosynthetic process                   | 5  | 0.006 |
| GO:0030054~cell junction                                              | 14 | 0.006 |
| GO:0005230~extracellular ligand-gated ion channel activity            | 5  | 0.007 |
| GO:0044456~synapse part                                               | 9  | 0.007 |
| GO:0030384~phosphoinositide metabolic process                         | 5  | 0.008 |
| GO:0046486~glycerolipid metabolic process                             | 7  | 0.008 |
| GO:0046489~phosphoinositide biosynthetic process                      | 4  | 0.009 |
| GO:0045017~glycerolipid biosynthetic process                          | 5  | 0.011 |
| GO:0044265~cellular macromolecule catabolic process                   | 16 | 0.012 |
| GO:0007610~behavior                                                   | 12 | 0.013 |
| GO:0022604~regulation of cell morphogenesis                           | 6  | 0.014 |
| GO:0008022~protein C-terminus binding                                 | 6  | 0.016 |
| GO:0004890~GABA-A receptor activity                                   | 3  | 0.017 |
| GO:0044432~endoplasmic reticulum part                                 | 10 | 0.018 |
| GO:0007010~cytoskeleton organization                                  | 11 | 0.020 |
| GO:0005124~scavenger receptor binding                                 | 2  | 0.021 |
| GO:0009057~macromolecule catabolic process                            | 16 | 0.021 |
| GO:0019941~modification-dependent protein catabolic process           | 13 | 0.022 |
| GO:0043632~modification-dependent macromolecule catabolic process     | 13 | 0.022 |
| GO:0016917~GABA receptor activity                                     | 3  | 0.026 |
| GO:0006512~ubiquitin cycle                                            | 3  | 0.027 |
| GO:0051603~proteolysis involved in cellular protein catabolic process | 13 | 0.029 |
| GO:0015267~channel activity                                           | 10 | 0.029 |
| GO:0031988~membrane-bounded vesicle                                   | 13 | 0.029 |
| GO:0022803~passive transmembrane transporter activity                 | 10 | 0.030 |
| GO:0044257~cellular protein catabolic process                         | 13 | 0.030 |
| GO:0007611~learning or memory                                         | 5  | 0.032 |
| GO:0005789~endoplasmic reticulum membrane                             | 8  | 0.035 |
| GO:0001505~regulation of neurotransmitter levels                      | 4  | 0.036 |
| GO:0030163~protein catabolic process                                  | 13 | 0.037 |
| GO:0007015~actin filament organization                                | 4  | 0.043 |
| GO:0031982~vesicle                                                    | 14 | 0.043 |
| GO:0042175~nuclear envelope-endoplasmic reticulum network             | 8  | 0.044 |
| GO:0022834~ligand-gated channel activity                              | 5  | 0.044 |
| GO:0015276~ligand-gated ion channel activity                          | 5  | 0.044 |
| <b>Epilepsy</b>                                                       |    |       |
| GO:0007218~neuropeptide signaling pathway                             | 3  | 0.008 |
| GO:0055085~transmembrane transport                                    | 5  | 0.009 |
| GO:0048585~negative regulation of response to stimulus                | 3  | 0.009 |
| GO:0032101~regulation of response to external stimulus                | 3  | 0.023 |

Note: Significance was determined as  $p < .05$ .



**Table S4.** List of significant processes for strict distribution among all 4 disorders from pathway analysis.

| <b>ID-ASD-Schizophrenia (Figure 1D, #1)</b>                       | <b># Genes</b> | <b>p value</b> |
|-------------------------------------------------------------------|----------------|----------------|
| GO:0042802~identical protein binding                              | 10             | 0.000          |
| GO:0008360~regulation of cell shape                               | 4              | 0.001          |
| GO:0022604~regulation of cell morphogenesis                       | 5              | 0.002          |
| GO:0004890~GABA-A receptor activity                               | 3              | 0.002          |
| GO:0016917~GABA receptor activity                                 | 3              | 0.003          |
| GO:0007268~synaptic transmission                                  | 6              | 0.006          |
| GO:0031982~vesicle                                                | 9              | 0.006          |
| GO:0042803~protein homodimerization activity                      | 6              | 0.007          |
| GO:0007267~cell-cell signaling                                    | 8              | 0.008          |
| GO:0031988~membrane-bounded vesicle                               | 8              | 0.009          |
| GO:0042493~response to drug                                       | 5              | 0.009          |
| GO:0019226~transmission of nerve impulse                          | 6              | 0.011          |
| GO:0031410~cytoplasmic vesicle                                    | 8              | 0.016          |
| GO:0044456~synapse part                                           | 5              | 0.019          |
| GO:0034707~chloride channel complex                               | 3              | 0.022          |
| GO:0016023~cytoplasmic membrane-bounded vesicle                   | 7              | 0.026          |
| GO:0001505~regulation of neurotransmitter levels                  | 3              | 0.027          |
| GO:0005230~extracellular ligand-gated ion channel activity        | 3              | 0.028          |
| GO:0005254~chloride channel activity                              | 3              | 0.028          |
| GO:0007369~gastrulation                                           | 3              | 0.030          |
| GO:0031404~chloride ion binding                                   | 3              | 0.032          |
| GO:0005253~anion channel activity                                 | 3              | 0.032          |
| GO:0007610~behavior                                               | 6              | 0.034          |
| GO:0003001~generation of a signal involved in cell-cell signaling | 3              | 0.042          |
| GO:0043168~anion binding                                          | 3              | 0.044          |
| GO:0046983~protein dimerization activity                          | 6              | 0.045          |
| GO:0030594~neurotransmitter receptor activity                     | 3              | 0.046          |
| <b>ID-Schizophrenia-Epilepsy (Figure 1D, #2)</b>                  |                |                |
| GO:0007218~neuropeptide signaling pathway                         | 3              | 0.006          |
| GO:0048585~negative regulation of response to stimulus            | 3              | 0.007          |
| GO:0032101~regulation of response to external stimulus            | 3              | 0.017          |
| GO:0055085~transmembrane transport                                | 4              | 0.032          |
| GO:0031348~negative regulation of defense response                | 2              | 0.044          |
| GO:0007613~memory                                                 | 2              | 0.048          |
| <b>ID-ASD (Figure 1D, #3)</b>                                     |                |                |
| GO:0030054~cell junction                                          | 4              | 0.014          |
| GO:0016338~calcium-independent cell-cell adhesion                 | 2              | 0.026          |
| GO:0046982~protein heterodimerization activity                    | 3              | 0.030          |
| <b>ID-Schizophrenia (Figure 1D, #4)</b>                           |                |                |
| GO:0005789~endoplasmic reticulum membrane                         | 5              | 0.001          |
| GO:0042175~nuclear envelope-endoplasmic reticulum network         | 5              | 0.001          |

|                                                     |   |       |
|-----------------------------------------------------|---|-------|
| GO:0044432~endoplasmic reticulum part               | 5 | 0.002 |
| GO:0046474~glycerophospholipid biosynthetic process | 3 | 0.003 |
| GO:0045017~glycerolipid biosynthetic process        | 3 | 0.004 |
| GO:0008654~phospholipid biosynthetic process        | 3 | 0.007 |
| GO:0008610~lipid biosynthetic process               | 4 | 0.007 |
| GO:0006650~glycerophospholipid metabolic process    | 3 | 0.009 |
| GO:0046486~glycerolipid metabolic process           | 3 | 0.017 |
| GO:0006644~phospholipid metabolic process           | 3 | 0.023 |
| GO:0019637~organophosphate metabolic process        | 3 | 0.026 |
| GO:0005922~connexon complex                         | 2 | 0.036 |
| GO:0012505~endomembrane system                      | 5 | 0.036 |
| GO:0006879~cellular iron ion homeostasis            | 2 | 0.038 |
| GO:0005911~cell-cell junction                       | 3 | 0.038 |
| GO:0006506~GPI anchor biosynthetic process          | 2 | 0.042 |
| GO:0006505~GPI anchor metabolic process             | 2 | 0.043 |
| GO:0055072~iron ion homeostasis                     | 2 | 0.044 |
| GO:0005921~gap junction                             | 2 | 0.047 |

**ASD-Schizophrenia (Figure 1D, #5)**

No results

**ASD-only (Figure 1D, #6)**

|                                                        |   |       |
|--------------------------------------------------------|---|-------|
| GO:0044456~synapse part                                | 3 | 0.004 |
| GO:0045202~synapse                                     | 3 | 0.007 |
| GO:0030054~cell junction                               | 3 | 0.015 |
| GO:0014069~postsynaptic density                        | 2 | 0.027 |
| GO:0045664~regulation of neuron differentiation        | 2 | 0.039 |
| GO:0050804~regulation of synaptic transmission         | 2 | 0.040 |
| GO:0051969~regulation of transmission of nerve impulse | 2 | 0.043 |
| GO:0031644~regulation of neurological system process   | 2 | 0.044 |
| GO:0050767~regulation of neurogenesis                  | 2 | 0.048 |

**ID-only (Figure 1D, #7)**

|                                                         |    |       |
|---------------------------------------------------------|----|-------|
| GO:0005031~tumor necrosis factor receptor activity      | 4  | 0.000 |
| GO:0043120~tumor necrosis factor binding                | 4  | 0.001 |
| GO:0050909~sensory perception of taste                  | 5  | 0.009 |
| GO:0007264~small GTPase mediated signal transduction    | 13 | 0.013 |
| GO:0017076~purine nucleotide binding                    | 52 | 0.013 |
| GO:0007265~Ras protein signal transduction              | 7  | 0.014 |
| GO:0032553~ribonucleotide binding                       | 50 | 0.014 |
| GO:0032555~purine ribonucleotide binding                | 50 | 0.014 |
| GO:0051219~phosphoprotein binding                       | 4  | 0.015 |
| GO:0043065~positive regulation of apoptosis             | 16 | 0.016 |
| GO:0043068~positive regulation of programmed cell death | 16 | 0.017 |
| GO:0010942~positive regulation of cell death            | 16 | 0.018 |
| GO:0045309~protein phosphorylated amino acid binding    | 3  | 0.022 |
| GO:0016481~negative regulation of transcription         | 16 | 0.028 |
| GO:0030036~actin cytoskeleton organization              | 10 | 0.028 |
| GO:0019717~synaptosome                                  | 6  | 0.029 |

|                                                          |    |       |
|----------------------------------------------------------|----|-------|
| GO:0016597~amino acid binding                            | 5  | 0.030 |
| GO:0042981~regulation of apoptosis                       | 24 | 0.030 |
| GO:0043067~regulation of programmed cell death           | 24 | 0.033 |
| GO:0010941~regulation of cell death                      | 24 | 0.034 |
| GO:0006855~multidrug transport                           | 2  | 0.037 |
| GO:0019001~guanyl nucleotide binding                     | 14 | 0.039 |
| GO:0032561~guanyl ribonucleotide binding                 | 14 | 0.039 |
| GO:0005353~fructose transmembrane transporter activity   | 2  | 0.039 |
| GO:0030029~actin filament-based process                  | 10 | 0.039 |
| GO:0046578~regulation of Ras protein signal transduction | 9  | 0.046 |
| GO:0015149~hexose transmembrane transporter activity     | 3  | 0.048 |
| GO:0007242~intracellular signaling cascade               | 33 | 0.049 |
| <b>Schizophrenia-only (Figure 1D, #8)</b>                |    |       |
| GO:0016247~channel regulator activity                    | 2  | 0.031 |

Note: Strict criteria classification was defined as copy number variants (CNVs) that were significant for a given disorder. See Figure 1D for distribution groupings. ASD = autism spectrum disorder; ID = intellectual disability.

**Table S5.** List of significant processes for broad distribution among all 4 disorders from pathway analysis.

| <b>ID-ASD-Schizophrenia-Epilepsy (Figure 1J, #1)</b>       | <b># Genes</b> | <b>p value</b> |
|------------------------------------------------------------|----------------|----------------|
| GO:0008360~regulation of cell shape                        | 5              | 0.000          |
| GO:0022604~regulation of cell morphogenesis                | 6              | 0.001          |
| GO:0030054~cell junction                                   | 10             | 0.001          |
| GO:0042802~identical protein binding                       | 10             | 0.002          |
| GO:0015267~channel activity                                | 8              | 0.002          |
| GO:0022803~passive transmembrane transporter activity      | 8              | 0.002          |
| GO:0004890~GABA-A receptor activity                        | 3              | 0.003          |
| GO:0005230~extracellular ligand-gated ion channel activity | 4              | 0.004          |
| GO:0034702~ion channel complex                             | 6              | 0.004          |
| GO:0007268~synaptic transmission                           | 7              | 0.004          |
| GO:0016917~GABA receptor activity                          | 3              | 0.005          |
| GO:0044459~plasma membrane part                            | 21             | 0.005          |
| GO:0030594~neurotransmitter receptor activity              | 4              | 0.008          |
| GO:0044456~synapse part                                    | 6              | 0.008          |
| GO:0019226~transmission of nerve impulse                   | 7              | 0.009          |
| GO:0045202~synapse                                         | 7              | 0.009          |
| GO:0042165~neurotransmitter binding                        | 4              | 0.010          |
| GO:0042803~protein homodimerization activity               | 6              | 0.014          |
| GO:0031348~negative regulation of defense response         | 3              | 0.014          |
| GO:0015276~ligand-gated ion channel activity               | 4              | 0.017          |
| GO:0022834~ligand-gated channel activity                   | 4              | 0.017          |
| GO:0031982~vesicle                                         | 9              | 0.020          |
| GO:0007010~cytoskeleton organization                       | 7              | 0.024          |
| GO:0031988~membrane-bounded vesicle                        | 8              | 0.025          |
| GO:0005216~ion channel activity                            | 6              | 0.025          |
| GO:0022838~substrate specific channel activity             | 6              | 0.028          |
| GO:0031224~intrinsic to membrane                           | 37             | 0.029          |
| GO:0016021~integral to membrane                            | 36             | 0.029          |
| GO:0045211~postsynaptic membrane                           | 4              | 0.031          |
| GO:0034707~chloride channel complex                        | 3              | 0.032          |
| GO:0007610~behavior                                        | 7              | 0.032          |
| GO:0007267~cell-cell signaling                             | 8              | 0.033          |
| GO:0005254~chloride channel activity                       | 3              | 0.039          |
| GO:0000226~microtubule cytoskeleton organization           | 4              | 0.039          |
| GO:0007017~microtubule-based process                       | 5              | 0.040          |
| GO:0006811~ion transport                                   | 9              | 0.041          |
| GO:0031404~chloride ion binding                            | 3              | 0.044          |
| GO:0031410~cytoplasmic vesicle                             | 8              | 0.044          |
| GO:0022836~gated channel activity                          | 5              | 0.044          |
| GO:0005253~anion channel activity                          | 3              | 0.045          |
| GO:0000287~magnesium ion binding                           | 6              | 0.045          |
| GO:0001505~regulation of neurotransmitter levels           | 3              | 0.046          |
| <b>ID-ASD-Epilepsy (Figure 1J, #2)</b>                     |                |                |
| GO:0005031~tumor necrosis factor receptor activity         | 4              | 0.000          |
| GO:0043120~tumor necrosis factor binding                   | 4              | 0.000          |
| GO:0050909~sensory perception of taste                     | 5              | 0.006          |

|                                                                                          |    |       |
|------------------------------------------------------------------------------------------|----|-------|
| GO:0007265~Ras protein signal transduction                                               | 7  | 0.009 |
| GO:0050853~B cell receptor signaling pathway                                             | 3  | 0.009 |
| GO:0043065~positive regulation of apoptosis                                              | 15 | 0.014 |
| GO:0007264~small GTPase mediated signal transduction                                     | 12 | 0.014 |
| GO:0043068~positive regulation of programmed cell death                                  | 15 | 0.015 |
| GO:0010552~positive regulation of specific transcription from RNA polymerase II promoter | 5  | 0.015 |
| GO:0010942~positive regulation of cell death                                             | 15 | 0.016 |
| GO:0045309~protein phosphorylated amino acid binding                                     | 3  | 0.018 |
| GO:0019717~synaptosome                                                                   | 6  | 0.019 |
| GO:0017076~purine nucleotide binding                                                     | 47 | 0.020 |
| GO:0016597~amino acid binding                                                            | 5  | 0.022 |
| GO:0032555~purine ribonucleotide binding                                                 | 45 | 0.023 |
| GO:0032553~ribonucleotide binding                                                        | 45 | 0.023 |
| GO:0005829~cytosol                                                                       | 35 | 0.025 |
| GO:0046578~regulation of Ras protein signal transduction                                 | 9  | 0.026 |
| GO:0051056~regulation of small GTPase mediated signal transduction                       | 10 | 0.027 |
| GO:0006855~multidrug transport                                                           | 2  | 0.033 |
| GO:0005353~fructose transmembrane transporter activity                                   | 2  | 0.035 |
| GO:0050778~positive regulation of immune response                                        | 7  | 0.036 |
| GO:0015149~hexose transmembrane transporter activity                                     | 3  | 0.040 |
| GO:0008624~induction of apoptosis by extracellular signals                               | 6  | 0.041 |
| GO:0005089~Rho guanyl-nucleotide exchange factor activity                                | 5  | 0.043 |
| GO:0015145~monosaccharide transmembrane transporter activity                             | 3  | 0.044 |
| GO:0006887~exocytosis                                                                    | 6  | 0.045 |
| GO:0032582~negative regulation of gene-specific transcription                            | 4  | 0.047 |
| GO:0016481~negative regulation of transcription                                          | 14 | 0.047 |

#### **ID-Schizophrenia-Epilepsy (Figure 1J, #3)**

|                                                           |   |       |
|-----------------------------------------------------------|---|-------|
| GO:0005789~endoplasmic reticulum membrane                 | 5 | 0.001 |
| GO:0042175~nuclear envelope-endoplasmic reticulum network | 5 | 0.002 |
| GO:0046474~glycerophospholipid biosynthetic process       | 3 | 0.003 |
| GO:0044432~endoplasmic reticulum part                     | 5 | 0.004 |
| GO:0045017~glycerolipid biosynthetic process              | 3 | 0.004 |

#### **ID-ASD (Figure 1J, #4)**

|                                          |   |       |
|------------------------------------------|---|-------|
| GO:0009881~photoreceptor activity        | 2 | 0.011 |
| GO:0018298~protein-chromophore linkage   | 2 | 0.012 |
| GO:0007602~phototransduction             | 2 | 0.024 |
| GO:0009583~detection of light stimulus   | 2 | 0.028 |
| GO:0009582~detection of abiotic stimulus | 2 | 0.047 |

#### **ID-Epilepsy (Figure 1J, #5)**

|                            |   |       |
|----------------------------|---|-------|
| GO:0042995~cell projection | 5 | 0.045 |
|----------------------------|---|-------|

#### **ASD-Schizophrenia (Figure 1J, #6)**

No results

#### **ASD-only (Figure 1J, #7)**

|                                           |   |       |
|-------------------------------------------|---|-------|
| No results                                |   |       |
| <b>ID-only (Figure 1J, #8)</b>            |   |       |
| GO:0000781~chromosome, telomeric region   | 2 | 0.025 |
| <b>Schizophrenia-only (Figure 1J, #9)</b> |   |       |
| No results                                |   |       |

Note: Broad criteria classification was defined as copy number variants (CNVs) that were significant for a given disorder yet also exhibit the phenotype of another disorder of cognitive development. See Figure 1J for distribution groupings. ASD = autism spectrum disorder; ID = intellectual disability.

Accepted manuscript

**Table S6.** List of significant processes for copy number variant (CNV) categories from pathway analysis.

| <b>A</b>                                                     | <b># Genes</b> | <b>p value</b> |
|--------------------------------------------------------------|----------------|----------------|
| GO:0042493~response to drug                                  | 12             | 0.001          |
| GO:0008092~cytoskeletal protein binding                      | 19             | 0.002          |
| GO:0017076~purine nucleotide binding                         | 48             | 0.004          |
| GO:0006650~glycerophospholipid metabolic process             | 8              | 0.004          |
| GO:0000166~nucleotide binding                                | 54             | 0.004          |
| GO:0030036~actin cytoskeleton organization                   | 11             | 0.005          |
| GO:0046474~glycerophospholipid biosynthetic process          | 6              | 0.006          |
| GO:0031090~organelle membrane                                | 31             | 0.006          |
| GO:0005789~endoplasmic reticulum membrane                    | 12             | 0.006          |
| GO:0015631~tubulin binding                                   | 7              | 0.006          |
| GO:0022604~regulation of cell morphogenesis                  | 8              | 0.007          |
| GO:0007010~cytoskeleton organization                         | 16             | 0.007          |
| GO:0012505~endomembrane system                               | 24             | 0.007          |
| GO:0030054~cell junction                                     | 18             | 0.007          |
| GO:0008654~phospholipid biosynthetic process                 | 7              | 0.007          |
| GO:0030029~actin filament-based process                      | 11             | 0.008          |
| GO:0042175~nuclear envelope-endoplasmic reticulum network    | 12             | 0.009          |
| GO:0050853~B cell receptor signaling pathway                 | 3              | 0.009          |
| GO:0045017~glycerolipid biosynthetic process                 | 6              | 0.011          |
| GO:0002260~lymphocyte homeostasis                            | 4              | 0.011          |
| GO:0032555~purine ribonucleotide binding                     | 44             | 0.012          |
| GO:0032553~ribonucleotide binding                            | 44             | 0.012          |
| GO:0008360~regulation of cell shape                          | 5              | 0.013          |
| GO:0006887~exocytosis                                        | 7              | 0.013          |
| GO:0006644~phospholipid metabolic process                    | 9              | 0.015          |
| GO:0044432~endoplasmic reticulum part                        | 13             | 0.015          |
| GO:0051028~mRNA transport                                    | 6              | 0.015          |
| GO:0015893~drug transport                                    | 3              | 0.019          |
| GO:0046486~glycerolipid metabolic process                    | 8              | 0.020          |
| GO:0019637~organophosphate metabolic process                 | 9              | 0.020          |
| GO:0042802~identical protein binding                         | 19             | 0.021          |
| GO:0004707~MAP kinase activity                               | 3              | 0.022          |
| GO:0001776~leukocyte homeostasis                             | 4              | 0.022          |
| GO:0050658~RNA transport                                     | 6              | 0.024          |
| GO:0051236~establishment of RNA localization                 | 6              | 0.024          |
| GO:0050657~nucleic acid transport                            | 6              | 0.024          |
| GO:0032446~protein modification by small protein conjugation | 7              | 0.024          |
| GO:0016079~synaptic vesicle exocytosis                       | 3              | 0.025          |
| GO:0006403~RNA localization                                  | 6              | 0.027          |
| GO:0046489~phosphoinositide biosynthetic process             | 4              | 0.029          |
| GO:0030554~adenyl nucleotide binding                         | 37             | 0.030          |
| GO:0007265~Ras protein signal transduction                   | 6              | 0.032          |
| GO:0005230~extracellular ligand-gated ion channel activity   | 5              | 0.032          |
| GO:0008017~microtubule binding                               | 5              | 0.032          |
| GO:0007015~actin filament organization                       | 5              | 0.033          |
| GO:0005124~scavenger receptor binding                        | 2              | 0.033          |
| GO:0006855~multidrug transport                               | 2              | 0.033          |

|                                                                          |    |       |
|--------------------------------------------------------------------------|----|-------|
| GO:0030384~phosphoinositide metabolic process                            | 5  | 0.034 |
| GO:0031967~organelle envelope                                            | 18 | 0.035 |
| GO:0031975~envelope                                                      | 18 | 0.036 |
| GO:0001883~purine nucleoside binding                                     | 37 | 0.036 |
| GO:0004890~GABA-A receptor activity                                      | 3  | 0.039 |
| GO:0001882~nucleoside binding                                            | 37 | 0.039 |
| GO:0045202~synapse                                                       | 12 | 0.040 |
| GO:0015931~nucleobase, nucleoside, nucleotide and nucleic acid transport | 6  | 0.042 |
| GO:0007267~cell-cell signaling                                           | 17 | 0.046 |
| GO:0043029~T cell homeostasis                                            | 3  | 0.048 |
| GO:0007163~establishment or maintenance of cell polarity                 | 4  | 0.049 |

**B**

|                                                        |    |       |
|--------------------------------------------------------|----|-------|
| GO:0050804~regulation of synaptic transmission         | 4  | 0.001 |
| GO:0051969~regulation of transmission of nerve impulse | 4  | 0.001 |
| GO:0031644~regulation of neurological system process   | 4  | 0.001 |
| GO:0044057~regulation of system process                | 4  | 0.009 |
| GO:0044456~synapse part                                | 4  | 0.009 |
| GO:0009881~photoreceptor activity                      | 2  | 0.019 |
| GO:0018298~protein-chromophore linkage                 | 2  | 0.022 |
| GO:0050767~regulation of neurogenesis                  | 3  | 0.022 |
| GO:0045211~postsynaptic membrane                       | 3  | 0.024 |
| GO:0045202~synapse                                     | 4  | 0.025 |
| GO:0048729~tissue morphogenesis                        | 3  | 0.026 |
| GO:0046928~regulation of neurotransmitter secretion    | 2  | 0.029 |
| GO:0051960~regulation of nervous system development    | 3  | 0.029 |
| GO:0060284~regulation of cell development              | 3  | 0.033 |
| GO:0006512~ubiquitin cycle                             | 2  | 0.033 |
| GO:0043169~cation binding                              | 11 | 0.034 |
| GO:0051588~regulation of neurotransmitter transport    | 2  | 0.036 |
| GO:0035295~tube development                            | 3  | 0.038 |
| GO:0043167~ion binding                                 | 11 | 0.038 |
| GO:0007416~synaptogenesis                              | 2  | 0.044 |
| GO:0007602~phototransduction                           | 2  | 0.045 |
| GO:0060341~regulation of cellular localization         | 3  | 0.047 |

**C**

|                                                         |    |       |
|---------------------------------------------------------|----|-------|
| GO:0005031~tumor necrosis factor receptor activity      | 4  | 0.000 |
| GO:0043120~tumor necrosis factor binding                | 4  | 0.000 |
| GO:0050909~sensory perception of taste                  | 5  | 0.004 |
| GO:0019717~synaptosome                                  | 6  | 0.011 |
| GO:0016481~negative regulation of transcription         | 14 | 0.015 |
| GO:0043065~positive regulation of apoptosis             | 13 | 0.021 |
| GO:0042981~regulation of apoptosis                      | 20 | 0.022 |
| GO:0043068~positive regulation of programmed cell death | 13 | 0.022 |
| GO:0010942~positive regulation of cell death            | 13 | 0.023 |
| GO:0043067~regulation of programmed cell death          | 20 | 0.024 |
| GO:0010941~regulation of cell death                     | 20 | 0.025 |
| GO:0010629~negative regulation of gene expression       | 14 | 0.030 |



|                                                                                                         |    |       |
|---------------------------------------------------------------------------------------------------------|----|-------|
| GO:0015149~hexose transmembrane transporter activity                                                    | 3  | 0.030 |
| GO:0005353~fructose transmembrane transporter activity                                                  | 2  | 0.030 |
| GO:0032582~negative regulation of gene-specific transcription                                           | 4  | 0.031 |
| GO:0015145~monosaccharide transmembrane transporter activity                                            | 3  | 0.033 |
| GO:0045934~negative regulation of nucleobase, nucleoside, nucleotide and nucleic acid metabolic process | 14 | 0.033 |
| GO:0016202~regulation of striated muscle tissue development                                             | 4  | 0.035 |
| GO:0048546~digestive tract morphogenesis                                                                | 3  | 0.036 |
| GO:0055123~digestive system development                                                                 | 3  | 0.036 |
| GO:0043193~positive regulation of gene-specific transcription                                           | 5  | 0.036 |
| GO:0051172~negative regulation of nitrogen compound metabolic process                                   | 14 | 0.036 |
| GO:0048634~regulation of muscle development                                                             | 4  | 0.037 |
| GO:0005501~retinoid binding                                                                             | 3  | 0.040 |
| GO:0008276~protein methyltransferase activity                                                           | 4  | 0.040 |
| GO:0032583~regulation of gene-specific transcription                                                    | 6  | 0.044 |
| GO:0030036~actin cytoskeleton organization                                                              | 8  | 0.044 |
| GO:0005549~odorant binding                                                                              | 2  | 0.045 |
| GO:0019840~isoprenoid binding                                                                           | 3  | 0.047 |
| GO:0010552~positive regulation of specific transcription from RNA polymerase II promoter                | 4  | 0.048 |
| GO:0048742~regulation of skeletal muscle fiber development                                              | 3  | 0.049 |

**Figure S1.** Flow diagram detailing the method for significant copy number variants (CNVs) identification from eligible genome-wide association studies (GWAS) (1A). Note: Inclusion criteria includes (1) case-control methodology, (2) participant N>400 in both cases and controls, and (3) statistically significant CNVs in cases. Figure S2, available online, shows the process for assigning CNVs to disease categories (i.e. autism spectrum disorder [ASD], intellectual disability [ID], schizophrenia, and epilepsy) based on strict and broad criteria.

**Figure S2.** Graphic illustrations of prototypical copy number variant (CNV) categories (e.g. A, B, and C). Note: This figure is used to demonstrate how CNVs were assigned to one of the three categories. ASD = autism spectrum disorder; ID = intellectual disability.

## Supplemental Figure 1

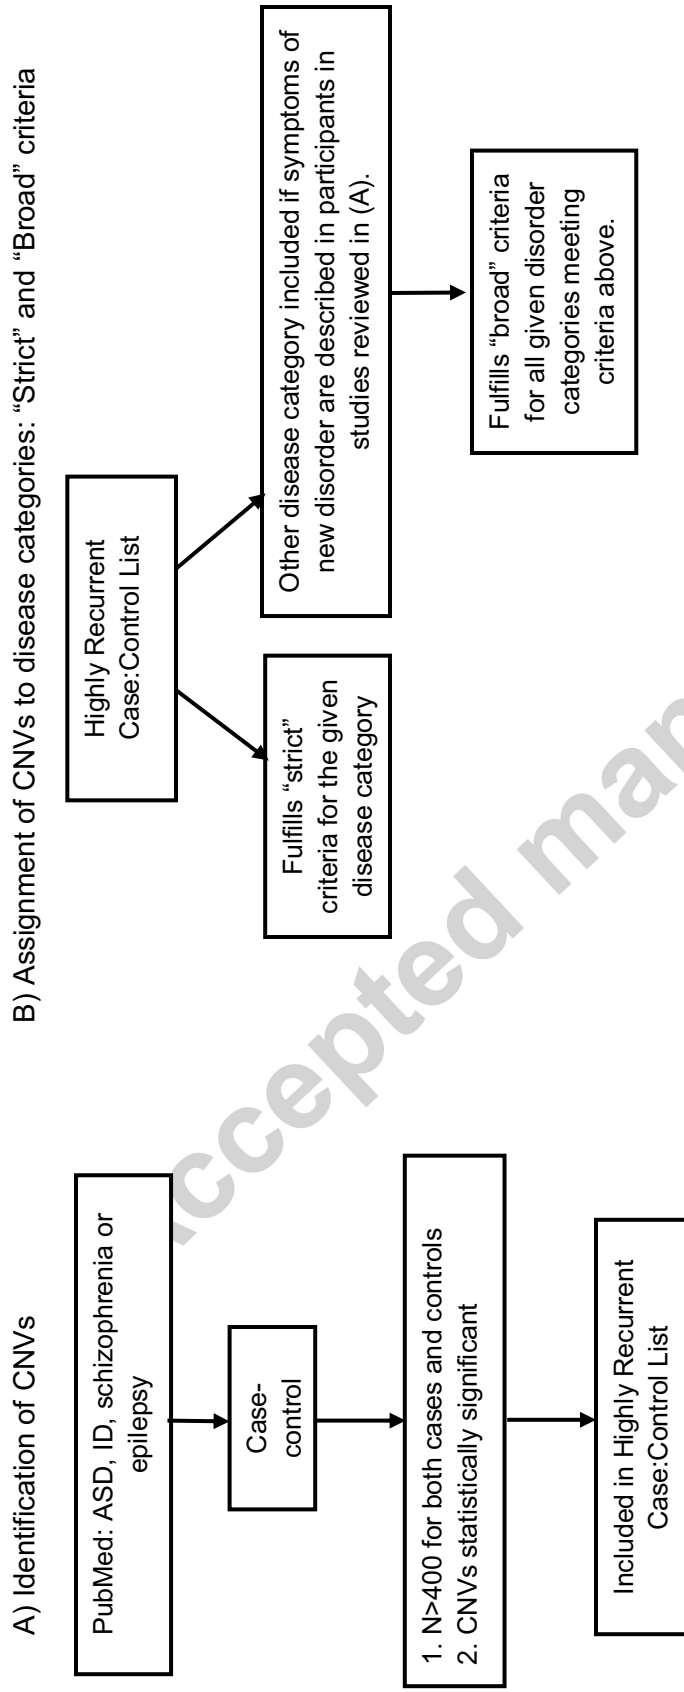

## Supplemental Figure 2

Category A.

Chromosome

Cases

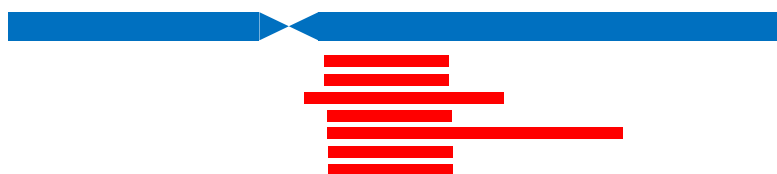

Category B.

Gene

Cases

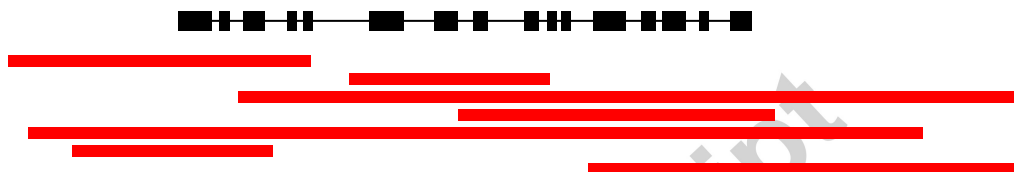

Category C.

Chromosome

Cases

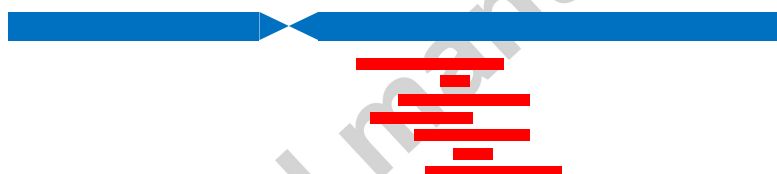

Accepted Manuscript
